# Supplementary material for: Synthesis of a highly stable Mo–Fe bimetallic metal–organic framework and its catalytic activity for the selective oxidation of sulfides under mild conditions
Source: Royal Society of Chemistry journal article supplement (doi:10.1039/d4ra06324d), 2024-01-01
Supplement: d4ra06324d1.pdf [file d4ra06324d1.pdf]

<Supporting Information>

**Synthesis of highly stable Mo-Fe bimetallic metal-organic framework and its catalytic activity for  
the selective oxidation of sulfides under mild conditions**

**Xin Li<sup>a\*</sup>, Mohan Zu<sup>a</sup>, Linzhuo Yan<sup>a</sup>, Qiang Zhao<sup>a\*</sup>, Liu Liu<sup>b\*</sup>**

*<sup>a</sup>College of Chemistry and Pharmacy Engineering, Nanyang Normal University, Nanyang, 473061, P. R. China.*

*<sup>b</sup>Nanyang Branch, Henan Provincial Tobacco Company, Nanyang, 473061, P. R. China.*

**\* Correspondence authors**

**E-mail: [lixin610207@126.com](mailto:lixin610207@126.com) (X. Li)**

**E-mail: [zhaoqiang0522@126.com](mailto:zhaoqiang0522@126.com) (Q. Zhao)**

**E-mail: [liuliu3281@126.com](mailto:liuliu3281@126.com) (L. Liu)**

**Table S1 Selected bond lengths (Å) and angles (°) for compound 1**

| <b>bond</b>  | <b>distances (Å)</b> | <b>bond</b>  | <b>distances (Å)</b> |
|--------------|----------------------|--------------|----------------------|
| Mo(1)-O(6)   | 1.699(5)             | Fe(1)-O(1)   | 2.134(5)             |
| Mo(1)-O(7)   | 1.760(5)             | Fe(1)-O(7)   | 2.150(5)             |
| Mo(1)-O(8)   | 1.802(5)             | Fe(1)-N(1)   | 2.165(6)             |
| Mo(1)-O(5)   | 1.814(5)             | Fe(1)-O(5)#3 | 2.203(5)             |
| Mo(2)-O(2)#1 | 1.735(5)             | Fe(2)-O(4)   | 2.059(5)             |
| Mo(2)-O(3)   | 1.757(5)             | Fe(2)-O(5)   | 2.094(5)             |
| Mo(2)-O(4)   | 1.772(5)             | Fe(2)-O(8)#2 | 2.101(5)             |
| Mo(2)-O(1)#2 | 1.818(5)             | Fe(2)-N(2)#4 | 2.125(6)             |
| Fe(1)-O(2)   | 2.054(5)             | Fe(2)-O(1)#3 | 2.136(5)             |
| Fe(1)-O(3)   | 2.077(5)             | Fe(2)-O(8)#3 | 2.230(5)             |

Symmetry code for 1: #1  $-1+x, -y-1, -z$ ; #2  $x+1, y, z$ ; #3  $1-x, -y, -z$ ; #4  $x+1, y+1, z+1$ .

Table S2 The summarize of heterogeneous catalysis of Mo conationing species

| Entry | Catalysts                                                                                                                                                                                                                                                                                                                                                                                                                                                                                                                                                                                                                                                                                                                                                                                                                                                                                                                    | O                             | S   | O:S | Sol.                                   | T<br>[°C] | t<br>[min] | Conv<br>./% | Sel/<br>% | Ref. |
|-------|------------------------------------------------------------------------------------------------------------------------------------------------------------------------------------------------------------------------------------------------------------------------------------------------------------------------------------------------------------------------------------------------------------------------------------------------------------------------------------------------------------------------------------------------------------------------------------------------------------------------------------------------------------------------------------------------------------------------------------------------------------------------------------------------------------------------------------------------------------------------------------------------------------------------------|-------------------------------|-----|-----|----------------------------------------|-----------|------------|-------------|-----------|------|
| 1     | Mo <sub>8</sub> O <sub>26</sub> -calixarene                                                                                                                                                                                                                                                                                                                                                                                                                                                                                                                                                                                                                                                                                                                                                                                                                                                                                  | H <sub>2</sub> O <sub>2</sub> | 0.2 | 1   | CH <sub>3</sub> CN                     | 50        | 40         | 81          | 91        | 1    |
| 2     | Cs <sub>4</sub> [M(H <sub>2</sub> O) <sub>4</sub> ][PMo <sub>6</sub> O <sub>21</sub> (PABA) <sub>3</sub> ] <sub>2</sub> ·nH <sub>2</sub> O<br>(M = Co, Mn, Ni, Zn; PABA = p-aminobenzoic acid)                                                                                                                                                                                                                                                                                                                                                                                                                                                                                                                                                                                                                                                                                                                               | H <sub>2</sub> O <sub>2</sub> | 0.2 | 1.2 | CH <sub>3</sub> OH                     | 25        | 20         | 99          | 98        | 2    |
| 3     | [Co(BBPTZ) <sub>3</sub> ][HPMo <sub>12</sub> O <sub>40</sub> ]·24H <sub>2</sub> O BBPTZ=4,4'-bis(1,2,4-triazol-1-ylmethyl)biphenyl]                                                                                                                                                                                                                                                                                                                                                                                                                                                                                                                                                                                                                                                                                                                                                                                          | TBHP                          | 0.4 | 3   | CH <sub>2</sub> Cl <sub>2</sub>        | 50        | 15         | 100         |           | 3    |
| 4     | [Mn(TMR4A)(H <sub>2</sub> O) <sub>4</sub> ] [Mo <sub>6</sub> O <sub>19</sub> ]·0.5CH <sub>3</sub> CH <sub>2</sub> OH·H <sub>2</sub> O (1),<br>[Ni(TMR4A)(H <sub>2</sub> O) <sub>4</sub> ][Mo <sub>6</sub> O <sub>19</sub> ]·0.5CH <sub>3</sub> CH <sub>2</sub> OH·H <sub>2</sub> O (2),<br>[Zn(TMR4A)(H <sub>2</sub> O) <sub>4</sub> ][Mo <sub>6</sub> O <sub>19</sub> ]·0.5CH <sub>3</sub> CH <sub>2</sub> OH·H <sub>2</sub> O (3),<br>[Co <sub>2</sub> (TMR4A) <sub>2</sub> (H <sub>2</sub> O) <sub>4</sub> (β-Mo <sub>8</sub> O <sub>26</sub> )]·CH <sub>3</sub> CN·12H <sub>2</sub> O (4)                                                                                                                                                                                                                                                                                                                                | TBHP                          | 0.4 | 1   | CH <sub>2</sub> Cl <sub>2</sub>        | 40        | 60         | 99          |           | 4    |
| 5     | [Co <sub>2</sub> Mo <sub>10</sub> H <sub>4</sub> O <sub>38</sub> ] <sub>6</sub> (en)[Cu <sub>3</sub> (ptz) <sub>4</sub> (H <sub>2</sub> O) <sub>4</sub> ][Co <sub>2</sub> Mo <sub>10</sub> H <sub>4</sub> O <sub>38</sub> ]·24H <sub>2</sub> O (1),<br>(Hbim) <sub>2</sub> {[Cu(bim) <sub>2</sub> (H <sub>2</sub> O) <sub>2</sub> ] <sub>2</sub> {Co <sub>2</sub> Mo <sub>10</sub> H <sub>4</sub> O <sub>38</sub> }}·5H <sub>2</sub> O (2),<br>H <sub>2</sub> [Cu(dpdo) <sub>3</sub> (H <sub>2</sub> O) <sub>4</sub> ][{Cu <sub>2</sub> (dpdo) <sub>3</sub> (H <sub>2</sub> O) <sub>4</sub> (CH <sub>3</sub> CN)} <sub>2</sub> {Co <sub>2</sub> Mo <sub>10</sub> H <sub>4</sub> O <sub>38</sub> }] <sub>2</sub> ·9H <sub>2</sub> O (3),<br>(H <sub>2</sub> bpp) <sub>4</sub> {[Cu(H <sub>2</sub> O) <sub>2</sub> ]{NaCo <sub>2</sub> Mo <sub>10</sub> H <sub>4</sub> O <sub>38</sub> }] <sub>2</sub> ·10H <sub>2</sub> O (4) | TBHP                          | 0.2 | 2   | CH <sub>3</sub> CN                     | 40        | 240        | 95          | 95        | 5    |
| 6     | [MoO <sub>3</sub> (2,2'-bipy)] <sub>n</sub>                                                                                                                                                                                                                                                                                                                                                                                                                                                                                                                                                                                                                                                                                                                                                                                                                                                                                  | TBHP                          | 1   | 3   | CH <sub>2</sub> Cl <sub>2</sub>        | 20        | 120        | 97          | 99        | 6    |
| 7     | M-Anderson-COF (MMo <sub>6</sub> , M = Mn <sup>3+</sup> , Co <sup>3+</sup> , Fe <sup>3+</sup> )                                                                                                                                                                                                                                                                                                                                                                                                                                                                                                                                                                                                                                                                                                                                                                                                                              | H <sub>2</sub> O <sub>2</sub> | 1   | 5   | CH <sub>3</sub> CN                     | 50        | 60         | 100         | 100       | 7    |
| 8     | K <sub>4</sub> H <sub>5</sub> [Ln <sub>3</sub> (H <sub>2</sub> O) <sub>14</sub> {(Mo <sub>8</sub> O <sub>24</sub> )(O <sub>3</sub> PCH <sub>2</sub> COO) <sub>3</sub> }] <sub>2</sub> ·23H <sub>2</sub> O<br>(Ln = Gd (1Gd), Tb (2Tb), Dy (3Dy))                                                                                                                                                                                                                                                                                                                                                                                                                                                                                                                                                                                                                                                                             | H <sub>2</sub> O <sub>2</sub> | 1   | 2   | CH <sub>3</sub> CN                     | 50        | 60         | 100         | 100       | 8    |
| 9     | Na <sub>2</sub> H <sub>2</sub> [Mo <sub>4</sub> O <sub>12</sub> (C <sub>8</sub> H <sub>17</sub> O <sub>5</sub> N) <sub>2</sub> ] <sub>2</sub> ·10H <sub>2</sub> O (1),<br>Na <sub>2</sub> [M(Bis-tris)(H <sub>2</sub> O)] <sub>2</sub> [Mo <sub>7</sub> O <sub>24</sub> ]·10H <sub>2</sub> O<br>[M = Cu, Ni, Co, Zn,<br>Bis-tris =2,2-Bis(hydroxymethyl)-2,2',2''-nitrilotriethanol],                                                                                                                                                                                                                                                                                                                                                                                                                                                                                                                                        | H <sub>2</sub> O <sub>2</sub> | 0.7 | 1.5 | C <sub>2</sub> H <sub>5</sub> OH       | 50        | 15         | 99          | 95        | 9    |
| 10    | [Mo(O)(O <sub>2</sub> ) <sub>2</sub> (Mepz) <sub>2</sub> ]                                                                                                                                                                                                                                                                                                                                                                                                                                                                                                                                                                                                                                                                                                                                                                                                                                                                   | H <sub>2</sub> O <sub>2</sub> | 1   | 1   | [C <sub>4</sub> mim][PF <sub>6</sub> ] | 20        | 60         | 80          | 96        | 10   |

|    |                                                                               |          |     |      |            |    |     |     |     |           |
|----|-------------------------------------------------------------------------------|----------|-----|------|------------|----|-----|-----|-----|-----------|
| 11 | $(C_{19}H_{42}N)_2[MoO(O_2)_2(C_2O_4)] \cdot H_2O$                            | $H_2O_2$ | 1   | 1    | $H_2O$     | 25 | 30  | 95  |     | 11        |
| 12 | $Fe_3O_4@Si-APFSB-MoO_2$                                                      | $H_2O_2$ | 10  | 1.5  | $H_2O$     | 55 | 5   | 99  | 95  | 12        |
| 13 | PMoCh                                                                         | $H_2O_2$ | 5   | 4    | $H_2O$     | 25 | 65  | 97  | 100 | 13        |
| 14 | ECS- $MoO_2(acac)_2$                                                          | TBHP     | 1   | 1.5  | $C_2H_5OH$ | 25 | 360 | 91  | 97  | 14        |
| 15 | [CMK-3/Im/ $MoO_4^{2-}$ ]                                                     | $H_2O_2$ | 1   | 2    | $CH_3CN$   | 25 | 7   | 96  |     | 15        |
| 16 | MFO@NS- $MoOO_2$                                                              | $H_2O_2$ | 1   | 1.5  | $H_2O$     | 55 | 5   | 98  | 95  | 16        |
| 17 | GO/[ $Fe_3O_4$ ]/ $Co_3O_4-MoO_3$                                             | $H_2O_2$ | 2   | 2.5  | $CH_3CN$   | 40 | 10  | 100 | 57  | 17        |
| 18 | $Fe_3O_4@SiO_2-APTES$                                                         | $H_2O_2$ | 1   | 5    | $CH_3CN$   | 40 | 50  | 100 | 78  | 18        |
| 19 | SBA-15@AP-LAEB- $Mo(VI)O_2$                                                   | $H_2O_2$ | 1   | 3    | $C_2H_5OH$ | 25 | 120 | 100 | 99  | 19        |
| 20 | (L) $Mo(VI)O_2@SBA-15$                                                        | $H_2O_2$ | 1   | 1    | $CH_3CN$   | 26 | 180 | 100 | 85  | 20        |
| 21 | $(C_{19}H_{42}N)_2[MoO(O_2)_2(C_2O_4)] \cdot H_2O$                            | $H_2O_2$ | 1   | 1    | $H_2O$     | 25 | 30  | 95  | 100 | 21        |
| 22 | [ $MoO_2(O_2)(L)_2$ ] <sub>2</sub> --MR [L = valine (MRVMo), alanine (MRAMo)] | $H_2O_2$ | 5   | 2    | $CH_3OH$   | 25 | 40  | 98  | 100 | 22        |
| 23 | $TiO_2/AA/MoO_2$                                                              | $H_2O_2$ | 1   | 2    | $CH_3OH$   | 70 | 30  | 100 | 100 | 23        |
| 24 | $Fe_3O_4@SiO_2-NH_2-Mo$                                                       | UHP      | 0.4 | 0.45 | $CH_3OH$   | 25 | 30  | 86  | 92  | 24        |
| 25 | [ $Fe_2(4,4'-bpy)Mo_2O_8$ ] $\cdot 3H_2O$                                     | $H_2O_2$ | 1   | 1    | $CH_3OH$   | 25 | 60  | 96  | 98  | This work |

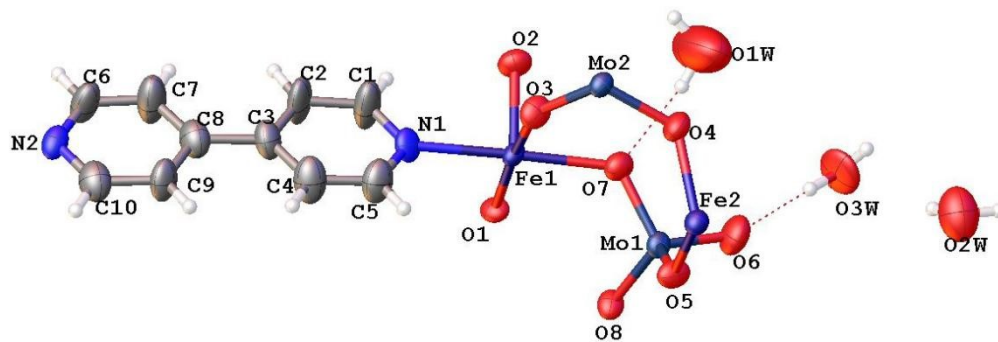

**Fig. S1.** Asymmetry unit structure of **1** with thermal ellipsoids set at 80% probability level.

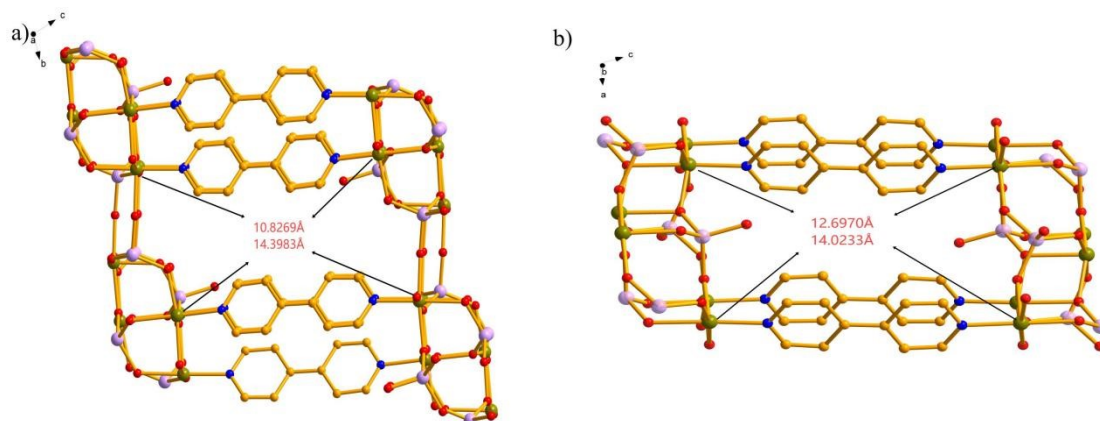

**Fig. S2. a) The dimensions of the channel and pore size of compound 1 along axis a. b) The dimensions of the channel and pore size of compound 1 along axis b.**

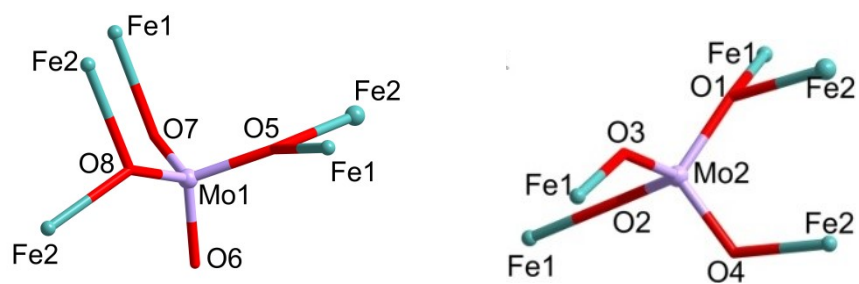

**Fig. S3.** Crystallographically fashions of the [MoO<sub>4</sub>]<sup>2-</sup> linker with iron atom in 1.

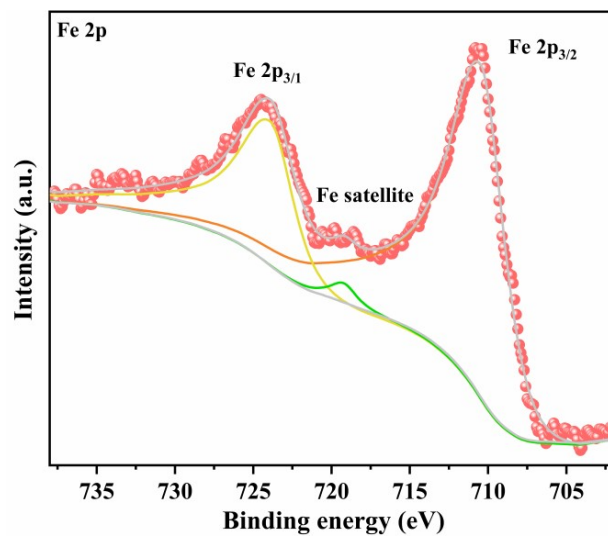

**Fig. S4.** The Fe 2p XPS spectra of compound 1.



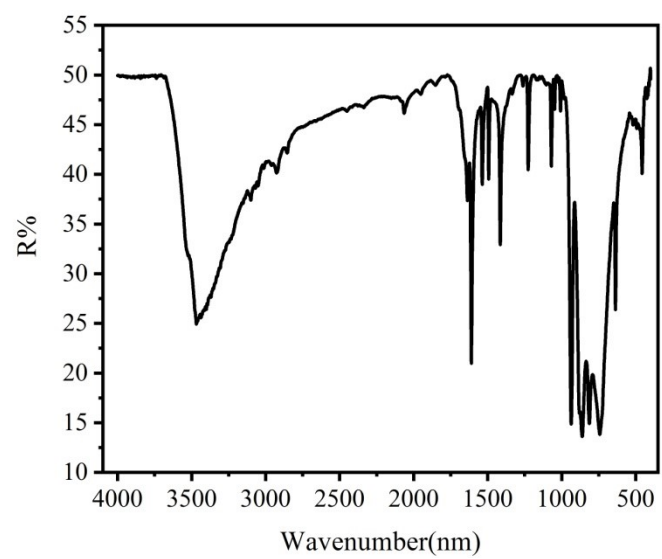

**Fig. S5. IR spectra of compound 1**

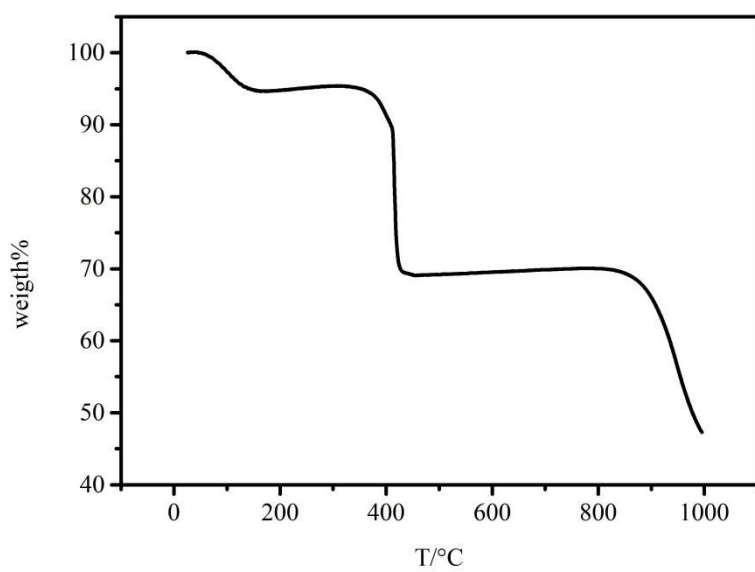

**Fig. S6. The TGA of the 1.**

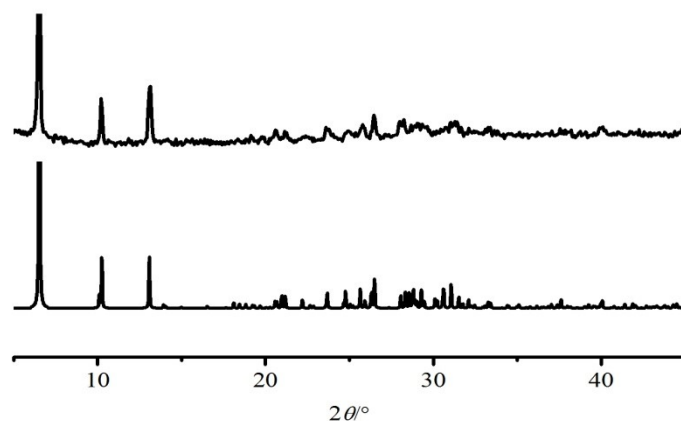

**Fig. S7. The experimental (top) and simulated (bottom) X-ray powder diffraction (XRPD) patterns of 1, showing that of the bulk product is in good agreement with the calculated one based on the single-crystal X-ray diffraction.**

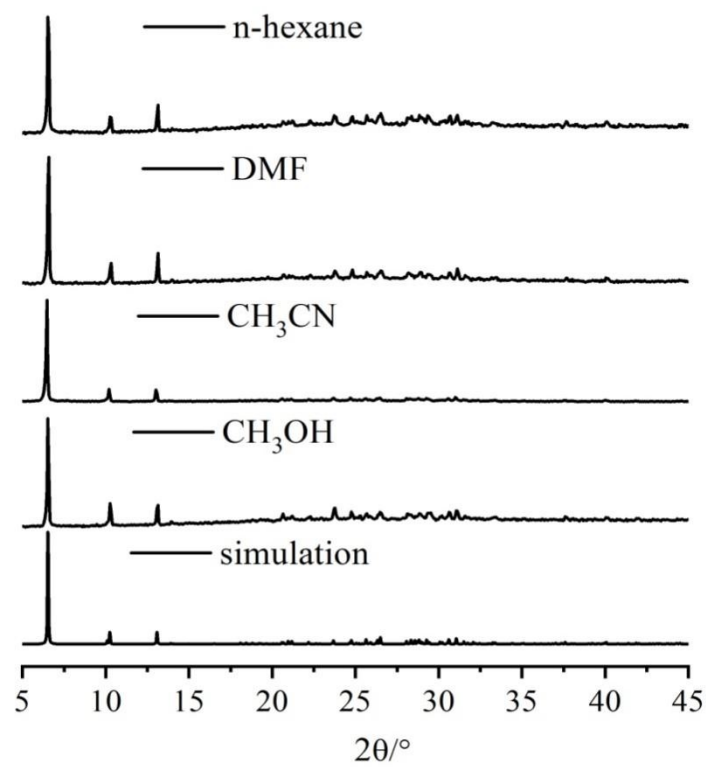

Fig. S8. The XRD of the sample immersed in varies solution for 2 days.

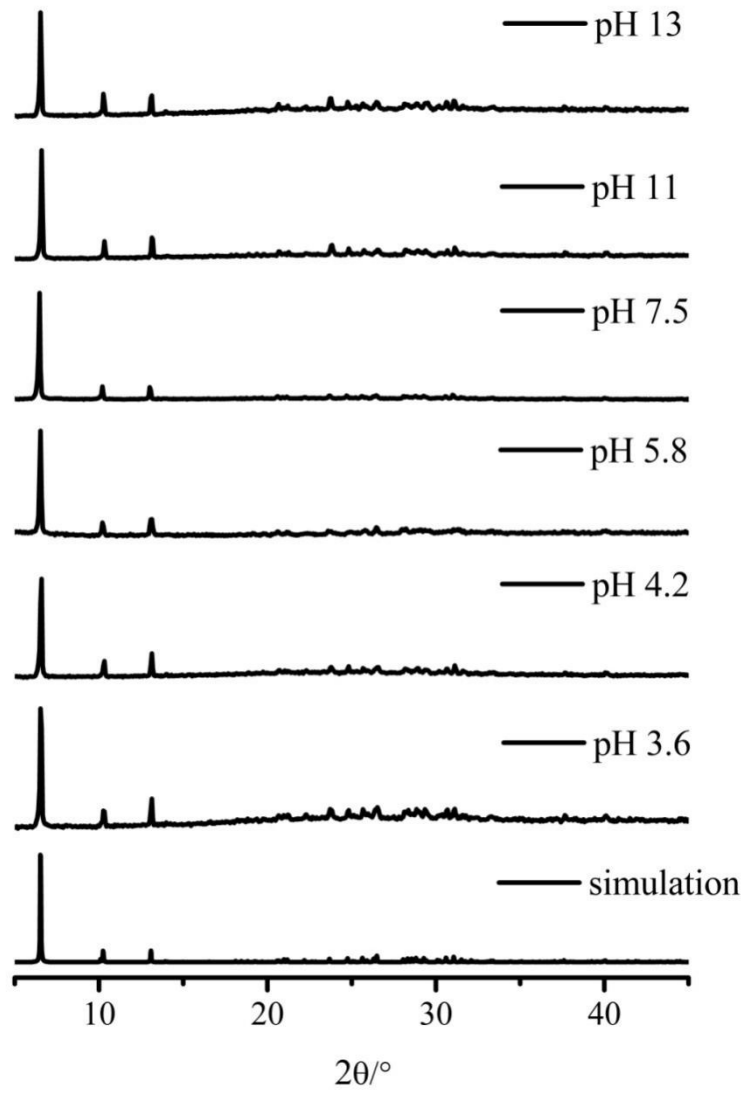

**Fig. S9.** The XRD of the sample immersed in varies pH solution for 2 days.

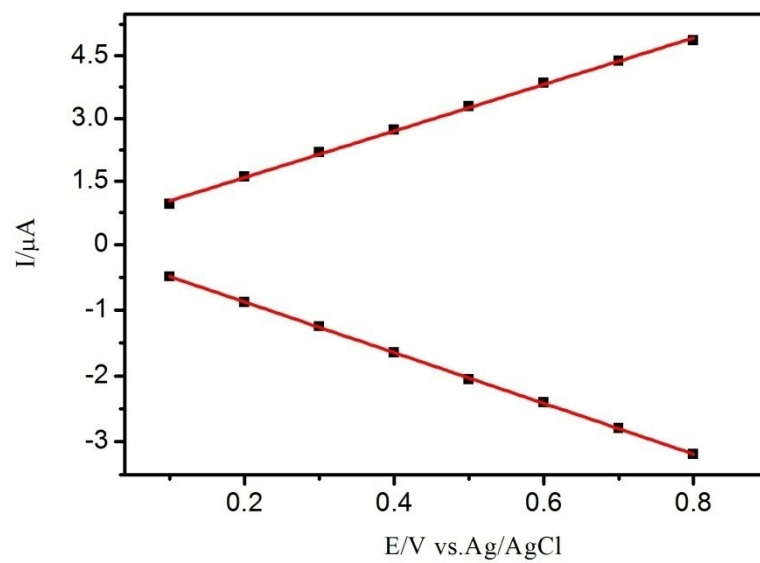

**Fig. S10.** The Diagram shows plots of the anodic (up) and the cathodic (down) peak currents for I-I' against.

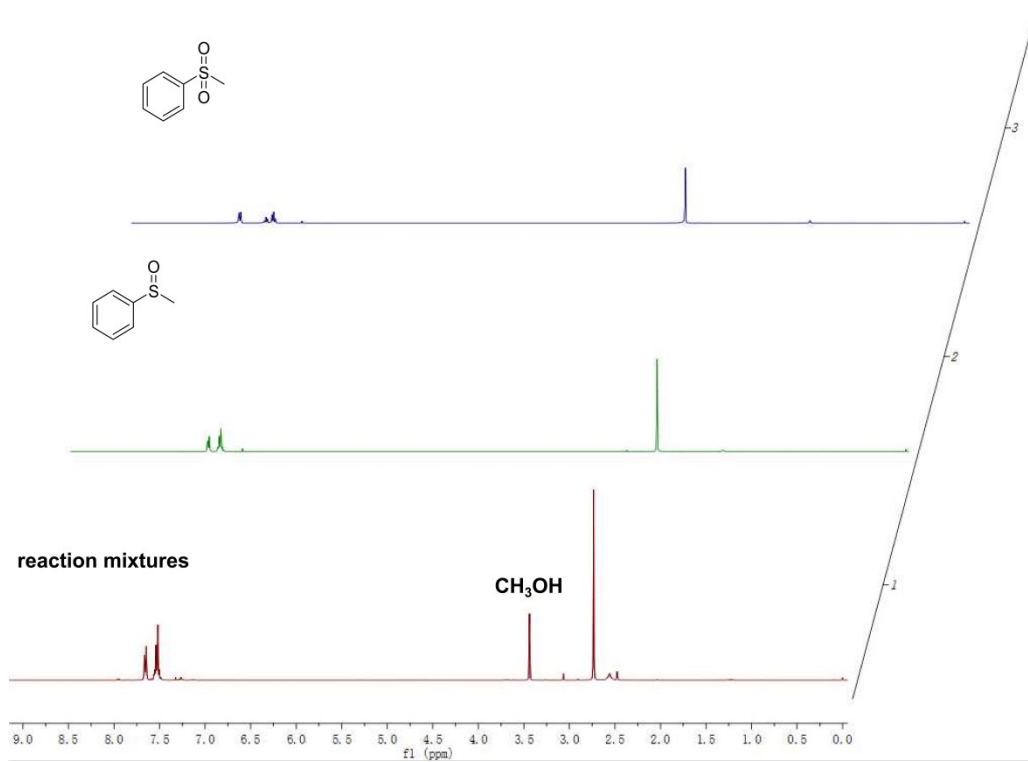

**Fig. S11. The  $^1\text{H-NMR}$  of the reaction mixtures after reaction.**

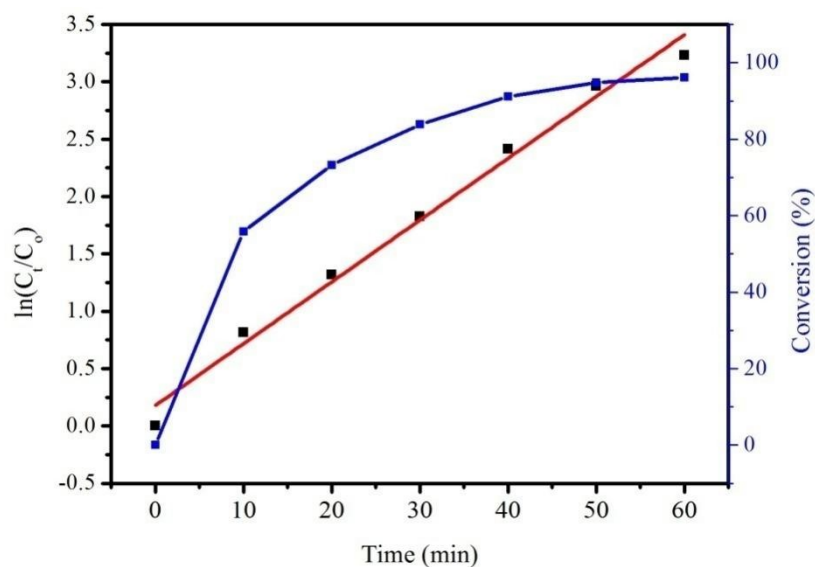

**Fig. S12.** Kinetics for oxidation of methyl phenyl sulfide using catalyst 1 at room temperature.  $C_0$  and  $C_t$  represent the concentrations of reactant initially and at time  $t$ , respectively. Equation:  $\ln(C_t/C_0) = -kt$ . Kinetic studies stated that the catalytic reaction follow first-order dependences [25].



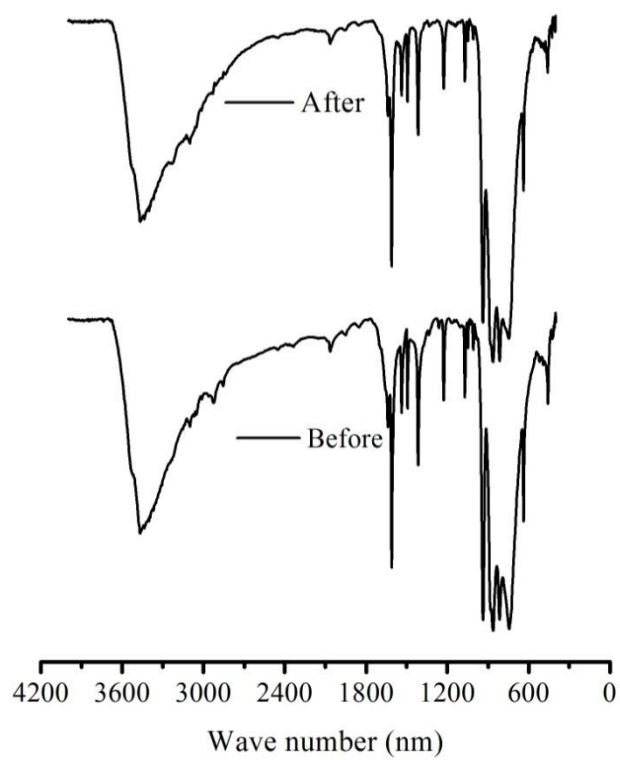

**Fig. S13. IR spectra of the catalyst 1 before and after reaction**

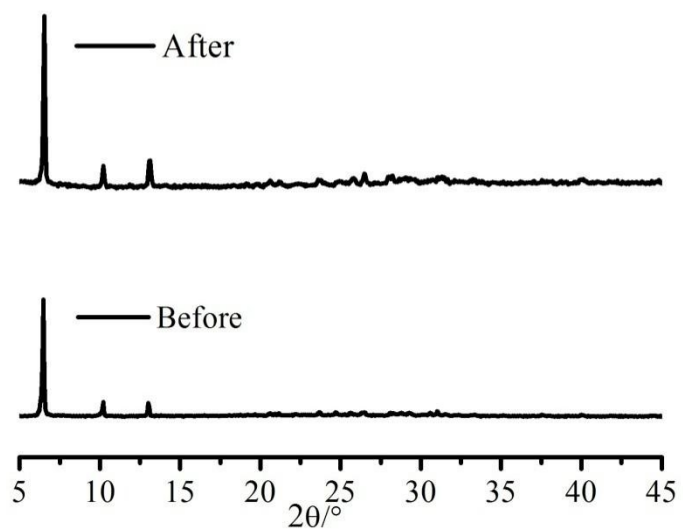

**Fig. S14. XRD for the catalyst 1 before and after reaction.**

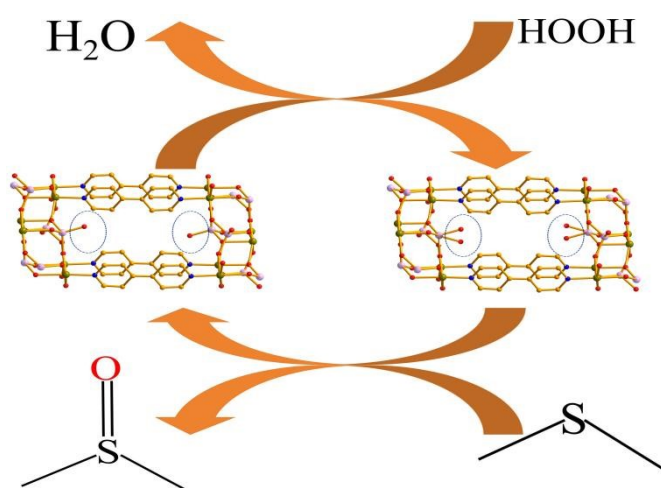

**Fig. S15.** Proposed catalytic mechanism for the sulfoxidation reaction using compound **1** and  $\text{H}_2\text{O}_2$  as an oxidant.

## References

- [1] S. Meninno, A. Parrella, G. Brancatelli, S. Geremia, C. Gaeta, C. Talotta, P. Neri, A. Lattanzi, Polyoxomolybdate-calix[4]arene hybrid: a catalyst for sulfoxidation reactions with hydrogen peroxide, *Org. Lett.* **17** (2015) 5100–5103.
- [2] H.Y. An, Y.J. Hou, S.Z. Chang, J. Zhang, Q.S. Zhu, Highly efficient oxidation of various thioethers catalyzed by organic ligand-modified polyoxomolybdates, *Inorg. Chem. Front.* **7** (2020) 169–176.
- [3] X.L. Hao, Y.Y. Ma, H.Y. Zang, Y.H. Wang, Y.G. Li, E.B. Wang, A polyoxometalate-encapsulating cationic metal–organic framework as a heterogeneous catalyst for desulfurization, *Chem. Eur. J.* **21** (2015) 3778 – 3784.
- [4] M.Y. Yu, J. Yang, T.T. Guo, J.F. Ma, Efficient catalytic oxidative desulfurization toward thioether and sulfur mustard stimulant by polyoxomolybdate–resorcin[4]arene based metal–organic materials, *Inorg. Chem.* **59** (2020) 4985–4994.
- [5] H.Y. An, Y.J. Hou, L. Wang, Y.M. Zhang, W. Yang, S.Z. Chang, Evans–showell-type polyoxometalates constructing high dimensional inorganic–organic hybrid compounds with copper–organic coordination complexes: synthesis and oxidation catalysis, *Inorg. Chem.* **56** (2017) 11619–11632.
- [6] I. Tosia, C. Vurchio, M. Abrantes, I.S. Gonçalves, M. Pillinger, F. Cavani, F.M. Cordero, A. Brandi,  $[\text{MoO}_3(2,2'\text{-bipy})]_n$  catalyzed oxidation of amines and sulfides, *Catal. Commun.* **103** (2018) 60–64.
- [7] R. Ma, N.F. Liu, T.T. Lin, T.B. Zhao, S.L. Huang, G.Y. Yang, Anderson polyoxometalate built-in covalent organic frameworks for enhancing catalytic performances, *J. Mater. Chem. A* **8** (2020) 8548–8553.
- [8] J.W. Wang, Y.J. Niu, M. Zhang, P.T. Ma, C. Zhang, J.Y. Niu, J.P. Wang, Organophosphonate-functionalized lanthanopolyoxomolybdate: synthesis, characterization, magnetism, luminescence, and catalysis of  $\text{H}_2\text{O}_2$ -based thioether oxidation, *Inorg. Chem.* **57** (2018) 1796–1805.
- [9] Y. Zhang, W.D. Yu, B. Li, Z.F. Chen, J. Yan, Discovery of a new family of polyoxometalate-based hybrids with improved catalytic performances for selective sulfoxidation: the synergy between classic heptamolybdate anions and complex cations, *Inorg. Chem.* **58** (2019)

14876–14884.

[10] C.J. Carrasco, F. Montilla, E. Álvarez, C. Mealli, G. Mancac, A. Galindo, Experimental and theoretical insights into the oxodiperoxomolybdenum-catalysed sulphide oxidation using hydrogen peroxide in ionic liquids, *Dalton Trans.* 43 (2014) 13711–13730

[11] R.D. Chakravarthy, V. Ramkumar, D.K. Chand, A molybdenum based metallomicellar catalyst for controlled and selective sulfoxidation reactions in aqueous medium, *Green Chem.* 16 (2014) 2190–2196.

[12] A. Bezaatpour, E. Askarizadeh, S. Akbarpour, M. Amiria, B. Babaei, Green oxidation of sulfides in solvent-free condition by reusable novel Mo(VI) complex anchored on magnetite as a high-efficiency nanocatalyst with eco-friendly aqueous H<sub>2</sub>O<sub>2</sub>, *Mol. Catal.* 436 (2017) 199–209.

[13] K. Ahmed, Ga. Saikia, P. Begum, S.R. Gogoi, M. Sharma, H. Talukdar, N.S. Islam, Selective and green sulfoxidation in water using a new chitosan supported Mo(VI) complex as heterogeneous catalyst, *ChemistrySelect* 3 (2018) 12563–12575.

[14] M. Hong, J.M. Yan, Immobilized molybdenum acetylacetonate complex on expanded starch for chemoselective oxidation of sulfides to sulfoxides with t-BuOOH at room temperature, *Phosphorus. Sulfur. Silicon.* 192 (2017) 985–988.

[15] F.H. Eshbala, A. Sedrpoushan, B. Breita, F. Mohanazadeh, H. Veisi, Ionic-liquid-modified CMK-3 as a support for the immobilization of molybdate ions (MoO<sub>4</sub><sup>2-</sup>): Heterogeneous nanocatalyst for selective oxidation of sulfides and benzylic alcohols. *Mater. Sci. Eng. C.* 110 (2020) 110577.

[16] B. Babaei, A. Bezaatpour, H. Basharnavaz, Robust and fast oxidation of sulfides by immobilized Mo(VI) complex on magnetic nanoparticles in solvent-free condition, *Polyhedron* 179 (2020) 114382.

[17] M. Khoshroo1, H.H. Monfared, Oxidation of sulfides with H<sub>2</sub>O<sub>2</sub> catalyzed by impregnated graphene oxide with Co–Cu–Zn doped Fe<sub>3</sub>O<sub>4</sub>/Co<sub>3</sub>O<sub>4</sub>–MoO<sub>3</sub> nanocomposite in acetonitrile, *J Inorg Organomet Polym.* 27 (2017) 165–175.

[18] A. Bayat, M.S. Fard, M.M. Hashemi, Selective oxidation of sulfides to sulfoxides by a molybdate-based catalyst using 30% hydrogen peroxide, *Catalysis Communications* 52 (2014) 16–21.

- [19] I. Saberikia, E. Safaei, B. Karimi, Y. Lee, Oxygenation of sulfides catalysed by SBA-15-immobilized molybdenum(VI) complex of a bis(phenol) diamine ligand using aqueous hydrogen peroxide as a green oxidant, *Appl. Organometal. Chem.* (2019) pp e4304.
- [20] A. Lazar, W.R. Thielb, A.P. Singh, Synthesis and characterization of 3-[N,N'-bis-3-(salicylidenamino)ethyltriamine] Mo(VI)O<sub>2</sub>@SBA-15: a highly stable and reusable catalyst for epoxidation and sulfoxidation reactions, *RSC Adv.* 4 (2014) 14063–14073.
- [21] R.D. Chakravarthy, V. Ramkumar, D.K. Chand, A molybdenum based metallomicellar catalyst for controlled and selective sulfoxidation reactions in aqueous medium, *Green Chem.*, 16 (2014) 2190–2196.
- [22] J.J. Boruah, S.P. Das, S.R. Ankireddy, S.R. Gogoi, N.S. Islam, Merrifield resin supported peroxomolybdenum(VI) compounds: recoverable heterogeneous catalysts for the efficient, selective and mild oxidation of organic sulfides with H<sub>2</sub>O<sub>2</sub>, *Green Chem.* 15 (2013) 2944–2959.
- [23] M. Jafarpour, A. Rezaeifard, M. Ghahramaninezhad, F. Feizpour, Dioxomolybdenum(VI) complex immobilized on ascorbic acid coated TiO<sub>2</sub> nanoparticles catalyzed heterogeneous oxidation of olefins and sulfides, *Green Chem.* 17 (2015) 442–452.
- [24] H. Keypour, M. Balali, M.M. Haghdoost, M. Bagherzadeh, Mo(VI) complex supported on Fe<sub>3</sub>O<sub>4</sub> nanoparticles: magnetically separable nanocatalysts for selective oxidation of sulfides to sulfoxides, *RSC Adv.* 5 (2015) 53349–53356.
- [25] R. Wan, P.P. He, Z. Liu, X.Y. Ma, P.T. Ma, V. Singh, C. Zhang, J.Y. Niu, J.P. Wang, A lacunary polyoxovanadate precursor and transition-metal sandwiched derivatives for catalytic oxidation of sulfides, *Chem. Eur. J.* 26 (2020) 1–8.
